# Supplementary material for: Hierarchical Porous Activated Carbon Derived from Coconut Shell for Ultrahigh-Performance Supercapacitors
Source: MDPI journal article supplement (doi:10.3390/molecules28207187), 2023-10-20
Supplement: s1 [file s1]

## Supporting Information

### **Hierarchical Porous Activated Carbon Derived from Coconut Shell for Ultrahigh-Performance Supercapacitors**

Yawei Wang <sup>1,\*</sup>, Yuhui Duan <sup>2</sup>, Xia Liang <sup>1</sup>, Liang Tang <sup>1</sup>, Lei Sun <sup>1</sup>,

Ruirui Wang <sup>1</sup>, Shunhang Wei <sup>3</sup>, Huanan Huang <sup>1</sup>, Pinghua Yang <sup>1</sup>

and Huanan Hu <sup>1,\*</sup>

1 School of Chemistry and Chemical Engineering, Jiangxi Province

Engineering Research Center of Ecological Chemical Industry, Jiujiang

University, Jiujiang 332005, China; 20200205648@jju.edu.cn (X.L.);

20200200942@jju.edu.cn (L.T.); 20200205239@jju.edu.cn (L.S.);

6080129@jju.edu.cn (R.W.); huanghn@jju.edu.cn (H.H.); 6080021@jju.edu.cn

(P.Y.)

2 Institute for Advanced Interdisciplinary Research (iAIR), University of

Jinan, Jinan 250022, China; 202130222057@stu.ujn.edu.cn

3 School of Mathematical Information, Shaoxing University, Shaoxing 312000,

China; wsh@usx.edu.cn

\* Correspondence: wangyw@jju.edu.cn (Y.W.); 6080075@jju.edu.cn (H.H.)

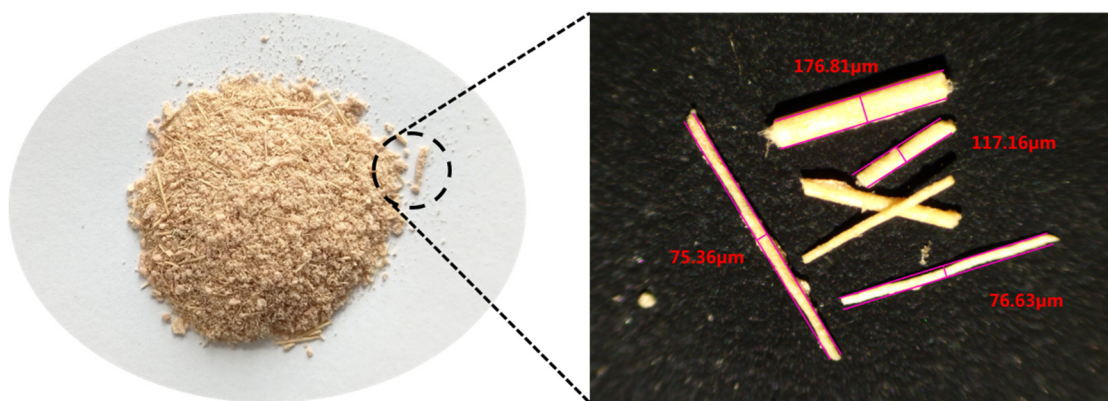

Figure S1. The optical micrograph of coconut shell powder.

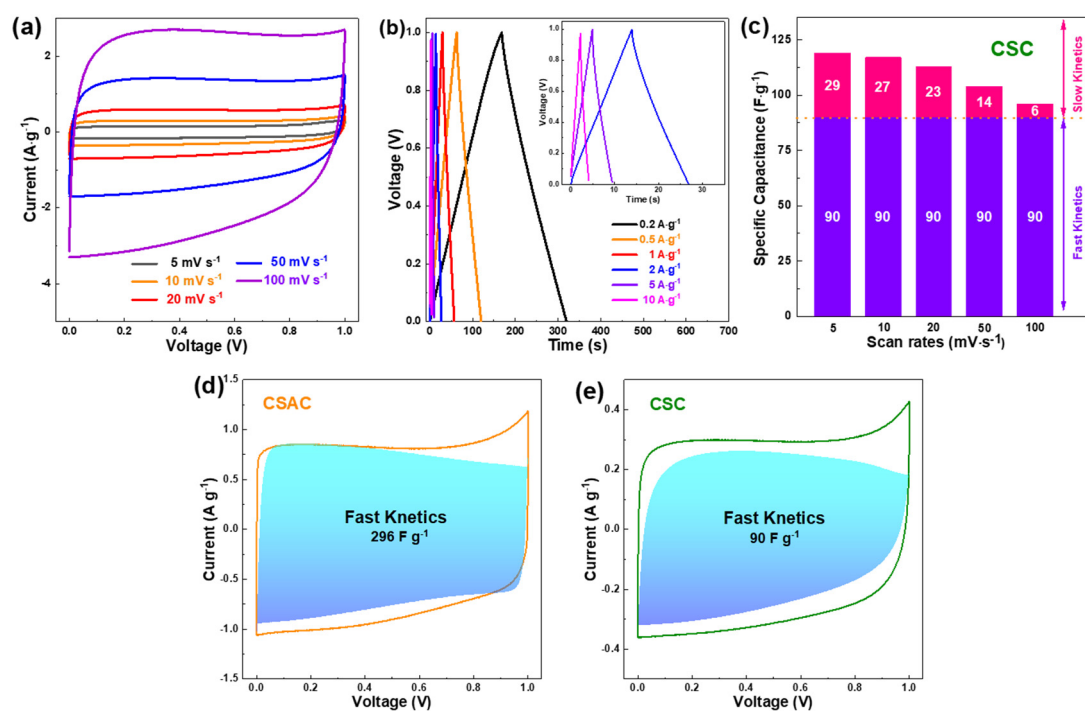

Figure S2. (a) CV and (b) GCD curves of CSC electrode at various scan rates or current densities. (c) Histogram of the decoupling capacitance contributions of CSC at various scan rates. Decoupling capacitance of (c) CSAC and (d) CSC electrode contributed by the fast-kinetic process (blue area) and the slow-dynamic processes (pink) at 10  $\text{mV s}^{-1}$ .

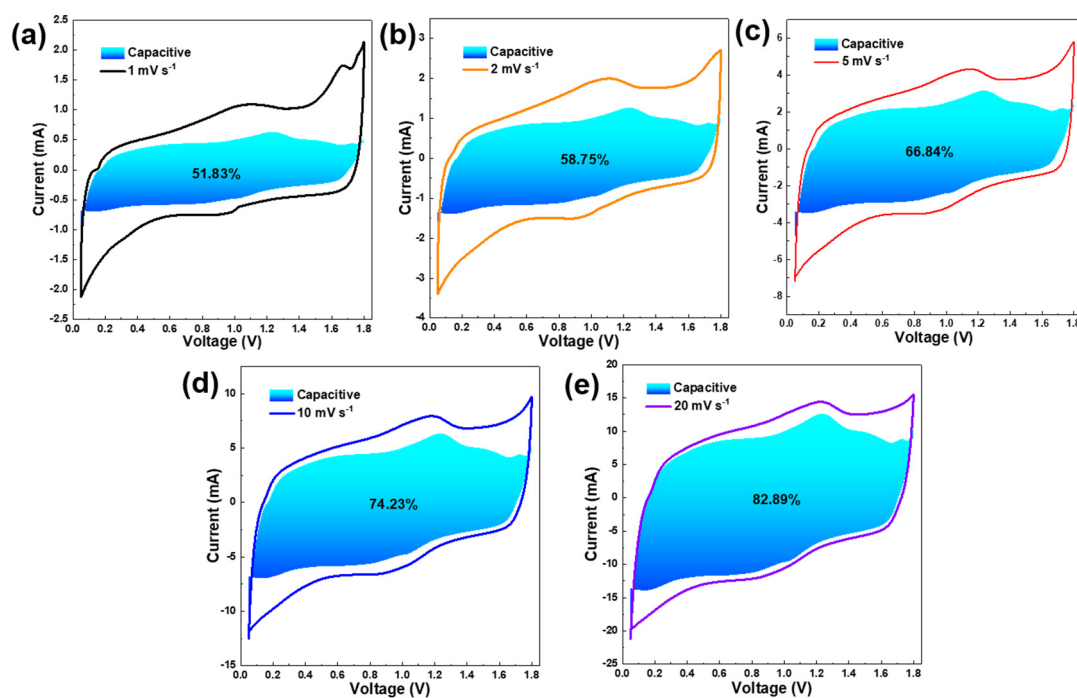

Figure S3. Capacitive contributions of CSAC cathode in ZHS at various scan rates: (a)  $1 \text{ mV s}^{-1}$ , (b)  $2 \text{ mV s}^{-1}$ , (c)  $5 \text{ mV s}^{-1}$ , (d)  $10 \text{ mV s}^{-1}$  and (e)  $20 \text{ mV s}^{-1}$ .

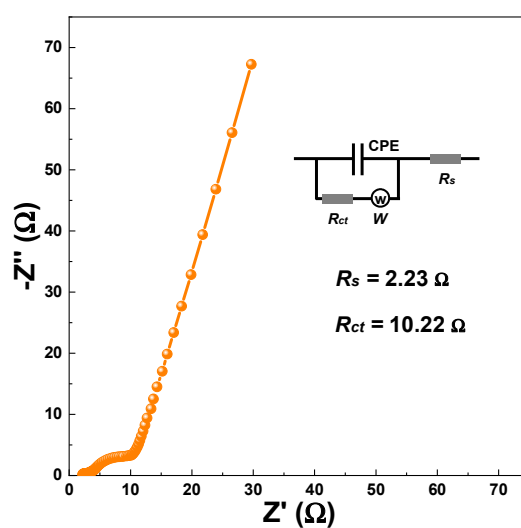

Figure S4. Nyquist plots of CSAC-based ZHS with frequency range of  $10^5$ -0.01 Hz.

Table S1. Electrochemical capacitances of CSC and CSAC electrodes calculated from CV and GCD curves of 6 M KOH-loaded symmetric device.

| Sample | Capacitance calculated from CV curves at various scan rates         |                       |                       |                       |                        |                       |
|--------|---------------------------------------------------------------------|-----------------------|-----------------------|-----------------------|------------------------|-----------------------|
|        | 5 mV s <sup>-1</sup>                                                | 10 mV s <sup>-1</sup> | 20 mV s <sup>-1</sup> | 50 mV s <sup>-1</sup> | 100 mV s <sup>-1</sup> |                       |
| CSC    | 119 F g <sup>-1</sup>                                               | 117 F g <sup>-1</sup> | 113 F g <sup>-1</sup> | 104 F g <sup>-1</sup> | 96 F g <sup>-1</sup>   |                       |
| CSAC   | 354 F g <sup>-1</sup>                                               | 340 F g <sup>-1</sup> | 331 F g <sup>-1</sup> | 320 F g <sup>-1</sup> | 311 F g <sup>-1</sup>  |                       |
| Sample | Capacitance calculated from GCD curves at various current densities |                       |                       |                       |                        |                       |
|        | 0.2 A g <sup>-1</sup>                                               | 0.5 A g <sup>-1</sup> | 1 A g <sup>-1</sup>   | 2 A g <sup>-1</sup>   | 5 A g <sup>-1</sup>    | 10 A g <sup>-1</sup>  |
| CSC    | 121 F g <sup>-1</sup>                                               | 115 F g <sup>-1</sup> | 110 F g <sup>-1</sup> | 103 F g <sup>-1</sup> | 90 F g <sup>-1</sup>   | 86 F g <sup>-1</sup>  |
| CSAC   | 367 F g <sup>-1</sup>                                               | 351 F g <sup>-1</sup> | 343 F g <sup>-1</sup> | 334 F g <sup>-1</sup> | 324 F g <sup>-1</sup>  | 316 F g <sup>-1</sup> |

Table S2. Electrochemical performance comparison of CSAC- and other biomass-derived carbons-based symmetric supercapacitors.

| Precursor                   | Sample                     | Electrolyte                         | Capacitance ( $\text{F g}^{-1}$ ) | Capacitance retention                        | Cycling stability                              | Ref.      |
|-----------------------------|----------------------------|-------------------------------------|-----------------------------------|----------------------------------------------|------------------------------------------------|-----------|
| Coconut shell               | CSAC                       | 6 M KOH                             | 367 ( $0.2 \text{ A g}^{-1}$ )    | 86.10% ( $0.2\text{-}10 \text{ A g}^{-1}$ )  | 92.09% ( $10 \text{ A g}^{-1}$ , 10000 cycles) | This work |
| Coconut shell               | 3DPGLS                     | 1 M TEMABF <sub>4</sub> /PC         | 91.15 ( $0.2 \text{ A g}^{-1}$ )  | 89.2% ( $0.2\text{-}2 \text{ A g}^{-1}$ )    | 85.1% ( $0.1 \text{ A g}^{-1}$ , 5000 cycles)  | [1]       |
| Coconut shell               | CSCK-800-2                 | 6 M KOH                             | 317 ( $0.5 \text{ A g}^{-1}$ )    | 68% ( $0.5\text{-}20 \text{ A g}^{-1}$ )     | 99.7% ( $5 \text{ A g}^{-1}$ , 10000 cycles)   | [2]       |
| Coconut shell and coal      | CJA15                      | 6 M KOH                             | 251.67 ( $0.5 \text{ A g}^{-1}$ ) | 77.9% ( $0.5\text{-}10 \text{ A g}^{-1}$ )   | -                                              | [3]       |
| Durian kernel               | DKAC-700                   | 6 M KOH                             | 330 ( $0.2 \text{ A g}^{-1}$ )    | 75.15% ( $0.2\text{-}20 \text{ A g}^{-1}$ )  | 97.9% ( $2 \text{ A g}^{-1}$ , 10000 cycles)   | [4]       |
| Pistachio shell             | NCNaK-1                    | 1 M KOH                             | 88 ( $0.5 \text{ A g}^{-1}$ )     | 77.27% ( $0.5\text{-}5 \text{ A g}^{-1}$ )   | 95.8% ( $10 \text{ A g}^{-1}$ , 5000 cycles)   | [5]       |
| Corn husk                   | ASCH-1:1                   | 6 M KOH                             | 127 ( $1 \text{ A g}^{-1}$ )      | 69.0% ( $1\text{-}20 \text{ A g}^{-1}$ )     | -                                              | [6]       |
| Plastic bags                | PE-HPC-900-NH <sub>3</sub> | 6 M KOH                             | 110 ( $0.05 \text{ A g}^{-1}$ )   | 90.9% ( $0.05\text{-}0.5 \text{ A g}^{-1}$ ) | 97.1% ( $2 \text{ A g}^{-1}$ , 10000 cycles)   | [7]       |
| Feather finger grass flower | HT-PC                      | 6 M KOH                             | 120 ( $1 \text{ A g}^{-1}$ )      | 70.6% ( $1\text{-}30 \text{ A g}^{-1}$ )     | 70% ( $10 \text{ A g}^{-1}$ , 10000 cycles)    | [8]       |
| Bamboo                      | ABC-900                    | 3 M KOH                             | 79 ( $0.5 \text{ A g}^{-1}$ )     | 81.9% ( $0.5\text{-}20 \text{ A g}^{-1}$ )   | 91.8% ( $3 \text{ A g}^{-1}$ , 10000 cycles)   | [9]       |
| Cornstalk                   | HPCS-3                     | 1 M H <sub>2</sub> SO <sub>4</sub>  | 413 ( $0.5 \text{ A g}^{-1}$ )    | 65.9% ( $0.5\text{-}10 \text{ A g}^{-1}$ )   | 92.6% ( $5 \text{ A g}^{-1}$ , 20000 cycles)   | [10]      |
| Cotton stalk                | FTMAC-4                    | 1 M H <sub>2</sub> SO <sub>4</sub>  | 254 ( $0.2 \text{ A g}^{-1}$ )    | 83.1% ( $0.2\text{-}10 \text{ A g}^{-1}$ )   | 96% ( $1 \text{ A g}^{-1}$ , 10000 cycles)     | [11]      |
| Rice straw                  | NMCSs@RSPC-1               | 6 M KOH                             | 268 ( $1 \text{ A g}^{-1}$ )      | 80.2% ( $1\text{-}10 \text{ A g}^{-1}$ )     | 90% ( $5 \text{ A g}^{-1}$ , 4000 cycles)      | [12]      |
| Lotus leaf                  | LLPC-800-1:3               | 6 M KOH                             | 274 ( $1 \text{ A g}^{-1}$ )      | 88% ( $1\text{-}10 \text{ A g}^{-1}$ )       | 90% ( $5 \text{ A g}^{-1}$ , 5000 cycles)      | [13]      |
| Rose                        | RAC-800-2                  | 1 M Na <sub>2</sub> SO <sub>4</sub> | 128.8 ( $0.5 \text{ A g}^{-1}$ )  | 72.3% ( $1\text{-}4 \text{ A g}^{-1}$ )      | 96% ( $5 \text{ A g}^{-1}$ , 10000 cycles)     | [14]      |
| Rice husk                   | PCNS/RHC <sub>8</sub>      | 6 M KOH                             | 315 ( $0.1 \text{ A g}^{-1}$ )    | 60% ( $0.1\text{-}50 \text{ A g}^{-1}$ )     | 95.8% ( $5 \text{ A g}^{-1}$ , 10000 cycles)   | [15]      |
| Tremella                    | THPC 1-24                  | 6 M KOH                             | 299.3 ( $0.5 \text{ A g}^{-1}$ )  | 83.6% ( $0.5\text{-}20 \text{ A g}^{-1}$ )   | 97% ( $10 \text{ A g}^{-1}$ , 50000 cycles)    | [16]      |

## References

1. J.S. Xia, N. Zhang, S.K. Chong, D. Li, Y. Chen, C.H. Sun, Three-dimensional porous graphene-like sheets synthesized from biocarbon via low-temperature graphitization for a supercapacitor, *Green Chem.* 20 (2018) 694-700.
2. Y. Zhao, J. Mu, Y. Wang, Y. Liu, H. Wang, H. Song, Preparation of hierarchical porous carbon through one-step KOH activation of coconut shell biomass for high-performance supercapacitor, *J. Mater. Sci-Mater. El.* 34 (2023) 527.
3. M. Bora, D. Bhattacharjya, S. Hazarika, X. Fan, B.K. Saikia, Blending of activated low-grade coal powder with coconut shell waste for supercapacitor applications, *Energ. Fuel.* 36 (2022) 14476-14489.
4. Y. Wang, W. Lu, X. Xu, F. Pang, X. Feng, X. Zhang, Y. Zeng, Z. Yang, R. Wang, P. Yang, L. Chen, Ternary-doped hierarchical porous carbons derived from durian kernel as electrode materials for efficient energy storage devices, *Diam. Relat. Mater.* 130 (2022) 109451.
5. O.C. Altinci, M. Demir, Beyond conventional activating methods, a green approach for the synthesis of biocarbon and its supercapacitor electrode performance, *Energ. Fuel.* 34 (2020) 7658-7665.
6. M.U. Rani, K. Nanaji, T.N. Rao, A.S. Deshpande, Corn husk derived activated carbon with enhanced electrochemical performance for high-voltage supercapacitors, *J. Power Sources* 471 (2020) 228387.
7. Y.M. Lian, M. Ni, Z.H. Huang, R.J. Chen, L. Zhou, W. Utetiwabo, W. Yang, Polyethylene waste carbons with a mesoporous network towards highly efficient supercapacitors, *Chem. Eng. J.* 366 (2019) 313-320.
8. R.A. Senthil, V.K. Yang, J.Q. Pan, Y.Z. Sun, A green and economical approach to derive biomass porous carbon from freely available feather finger grass flower for advanced symmetric supercapacitors, *J. Energy Storage* 35 (2021) 102287.
9. G.X. Zhang, Y.M. Chen, Y.G. Chen, H.B. Guo, Activated biomass carbon made from bamboo as electrode material for supercapacitors, *Mater. Res. Bull.* 102 (2018) 391-398.
10. C.J. Wang, D.P. Wu, H.J. Wang, Z.Y. Gao, F. Xu, K. Jiang, A green and scalable route to yield porous carbon sheets from biomass for supercapacitors with high capacity, *J. Mater. Chem. A* 6 (2018) 1244-1254.
11. X. Tian, H.G. Ma, Z. Li, S.C. Yan, L. Ma, F. Yu, G. Wang, X.H. Guo, Y.Q. Ma, C.P. Wong, Flute type micropores activated carbon from cotton stalk for high performance supercapacitors, *J. Power Sources* 359 (2017) 88-96.
12. S.B. Liu, Y. Zhao, B.H. Zhang, H. Xia, J.F. Zhou, W.K. Xie, H.J. Li, Nano-micro carbon spheres anchored on porous carbon derived from dual-biomass as high rate performance supercapacitor electrodes, *J. Power Sources* 381 (2018) 116-126.
13. S.S. Qu, J.F. Wan, C.C. Dai, T.Y. Jin, F.W. Ma, Promising as high-performance supercapacitor electrode materials porous carbons derived from biological lotus leaf, *J. Alloy. Compd.* 751 (2018) 107-116.
14. C.J. Zhao, Y.X. Huang, C.H. Zhao, X.X. Shao, Z.Q. Zhu, Rose-derived 3D carbon nanosheets for high cyclability and extended voltage supercapacitors, *Electrochim. Acta* 291 (2018) 287-296.
15. S. Dong, X.J. He, H.F. Zhang, X.Y. Xie, M.X. Yu, C. Yu, N. Xiao, J.S. Qiu, Surface modification of biomass-derived hard carbon by grafting porous carbon nanosheets for high-performance supercapacitors, *J. Mater. Chem. A* 6 (2018) 15954-15960.
16. D. Chen, L. Li, Y.L. Xi, J.Z. Li, M.J. Lu, J.M. Cao, W. Han, Self-assembly of biomass microfibers into 3D layer-stacking hierarchical porous carbon for high performance supercapacitors, *Electrochim. Acta* 286 (2018) 264-270.
